# Supplementary material for: Temporal dynamics of courtship and spawning in medaka under laboratory conditions revealed by 24-hour video monitoring: comparisons with natural environments
Source: Research Square preprint supplement (doi:10.21203/rs.3.rs-6610344/v1), 2025-05-12
Supplement: Supplementary file 1 [file 614059532be976cfb68bb040.docx]

**Supplementary Materials**

**Table S1.** The experiment date, male and female body mass, and spawning time of the day.

| Male ID | Experiment date | Male body mass (g) | Female body mass (g) | Spawning time (JST) |
| --- | --- | --- | --- | --- |
| 1 | 20250205 | 0.25 | 0.26 | 8:29 |
| 2 | 20250205 | 0.32 | 0.28 | 8:41 |
| 3 | 20250205 | 0.31 | 0.37 | 7:54 |
| 4 | 20250206 | 0.32 | 0.49 | 13:47 |
| 5 | 20250206 | 0.29 | 0.26 | 7:23 |
| 6 | 20250206 | 0.28 | 0.33 | 9:01 |
| 7 | 20250207 | 0.29 | 0.47 | 8:55 |
| 8 | 20250207 | 0.35 | 0.29 | 9:30 |
| 9 | 20250208 | 0.28 | 0.29 | 9:07 |
| 10 | 20250208 | 0.37 | 0.38 | 7:41 |
| 11 | 20250208 | 0.33 | 0.32 | 8:48 |
| 12 | 20250208 | 0.30 | 0.30 | 9:49 |
| 13 | 20250209 | 0.31 | 0.34 | 8:35 |
| 14 | 20250209 | 0.27 | 0.32 | 12:31 |
| 15 | 20250209 | 0.35 | 0.36 | 7:25 |
| 16 | 20250210 | 0.34 | 0.36 | 10:34 |
| 17 | 20250210 | 0.30 | 0.25 | 10:39 |
| 18 | 20250210 | 0.34 | 0.24 | 11:03 |
| 19 | 20250211 | 0.36 | 0.50 | 10:38 |
| 20 | 20250211 | 0.39 | 0.31 | 9:54 |
| 21 | 20250211 | 0.27 | 0.32 | 10:01 |
| 22 | 20250211 | 0.21 | 0.27 | 10:57 |
| 23 | 20250212 | 0.27 | 0.25 | 11:02 |
| 24 | 20250212 | 0.23 | 0.29 | 12:26 |
| 25 | 20250213 | 0.26 | 0.23 | 9:32 |
| 26 | 20250213 | 0.24 | 0.28 | 8:45 |
| 27 | 20250213 | 0.26 | 0.30 | 9:01 |
| 28 | 20250213 | 0.21 | 0.32 | 8:26 |
| 29 | 20250214 | 0.25 | 0.25 | 9:32 |
| 30 | 20250214 | 0.22 | 0.31 | 11:32 |
| 31 | 20250214 | 0.22 | 0.28 | 11:46 |
| 32 | 20250215 | 0.25 | 0.28 | 8:25 |
| 33 | 20250215 | 0.29 | 0.30 | 13:00 |
| 34 | 20250215 | 0.27 | 0.25 | 10:47 |
| 35 | 20250215 | 0.29 | 0.25 | 9:17 |

**Table S2.** Raw data for this study.

**Movie S1.** A spawning event of medaka using infrared camera.

**Movie S2.** Following behaviour using infrared camera.

**Movie S3.** Quick circle behaviour using infrared camera.
